# Supplementary material for: 7Li,31P Shift correlation. Application to the structural assignment of benzyllithium complexes of N-methyl-N-benzylphosphinamide
Source: Royal Society of Chemistry journal article supplement (doi:10.1039/b400994k), 2004-01-01
Supplement: b400994k.doc [file b400994k.doc]

SUPPORTING INFORMATION

**7Li,31P Shift correlation. Application to the structural assignment of *N*-methyl-*N*-phosphinylbenzyllithium complexes**

Ignacio Fernández and Fernando López Ortiz*

Área de Química Orgánica, Universidad de Almería, Carretera de Sacramento, 04120, Almería. Spain

**Contents:**

- General NMR experimental conditions.

- 1H, 31P HMQC NMR rows at the chemical shifts of the 31P signals **I**, **II,** and **III** at -105 ºC in Et2O-*d*10 (Figure S1)

- Analysis of the monomer-dimer equilibrium (Figure S2)

- 13C{1H, 31P} NMR spectrum showing expansion of the lithiated carbons region at -105 ºC (Figure S3)

**General NMR experimental conditions**

Spectra measured on a Bruker Avance 500 spectrometer equipped with a third radiofrequency channel. A 5 mm triple probe head was used. The outer coil was doubly tuned for 1H and 31P, and the inner coil was tunable in the frequency range 109Ag to 31P. The 90º pulse widths and operating frequencies were: 85 s (1H, 500 MHz), 15.7 s (7Li, 194.37 MHz), 31 s (31P, 202.46 MHz). The attenuation levels used were 15 dB for the proton channel and 0 dB for the heteronuclei. The spectral references used were, 85% H3PO4 for 31P and 1M LiBr in D2O for 7Li. A set of two complementary 31P/7Li selective band pass/stop frequency filters were used for the acquisition of the 31P{7Li,1H} and 7Li{31P,1H} NMR spectra.


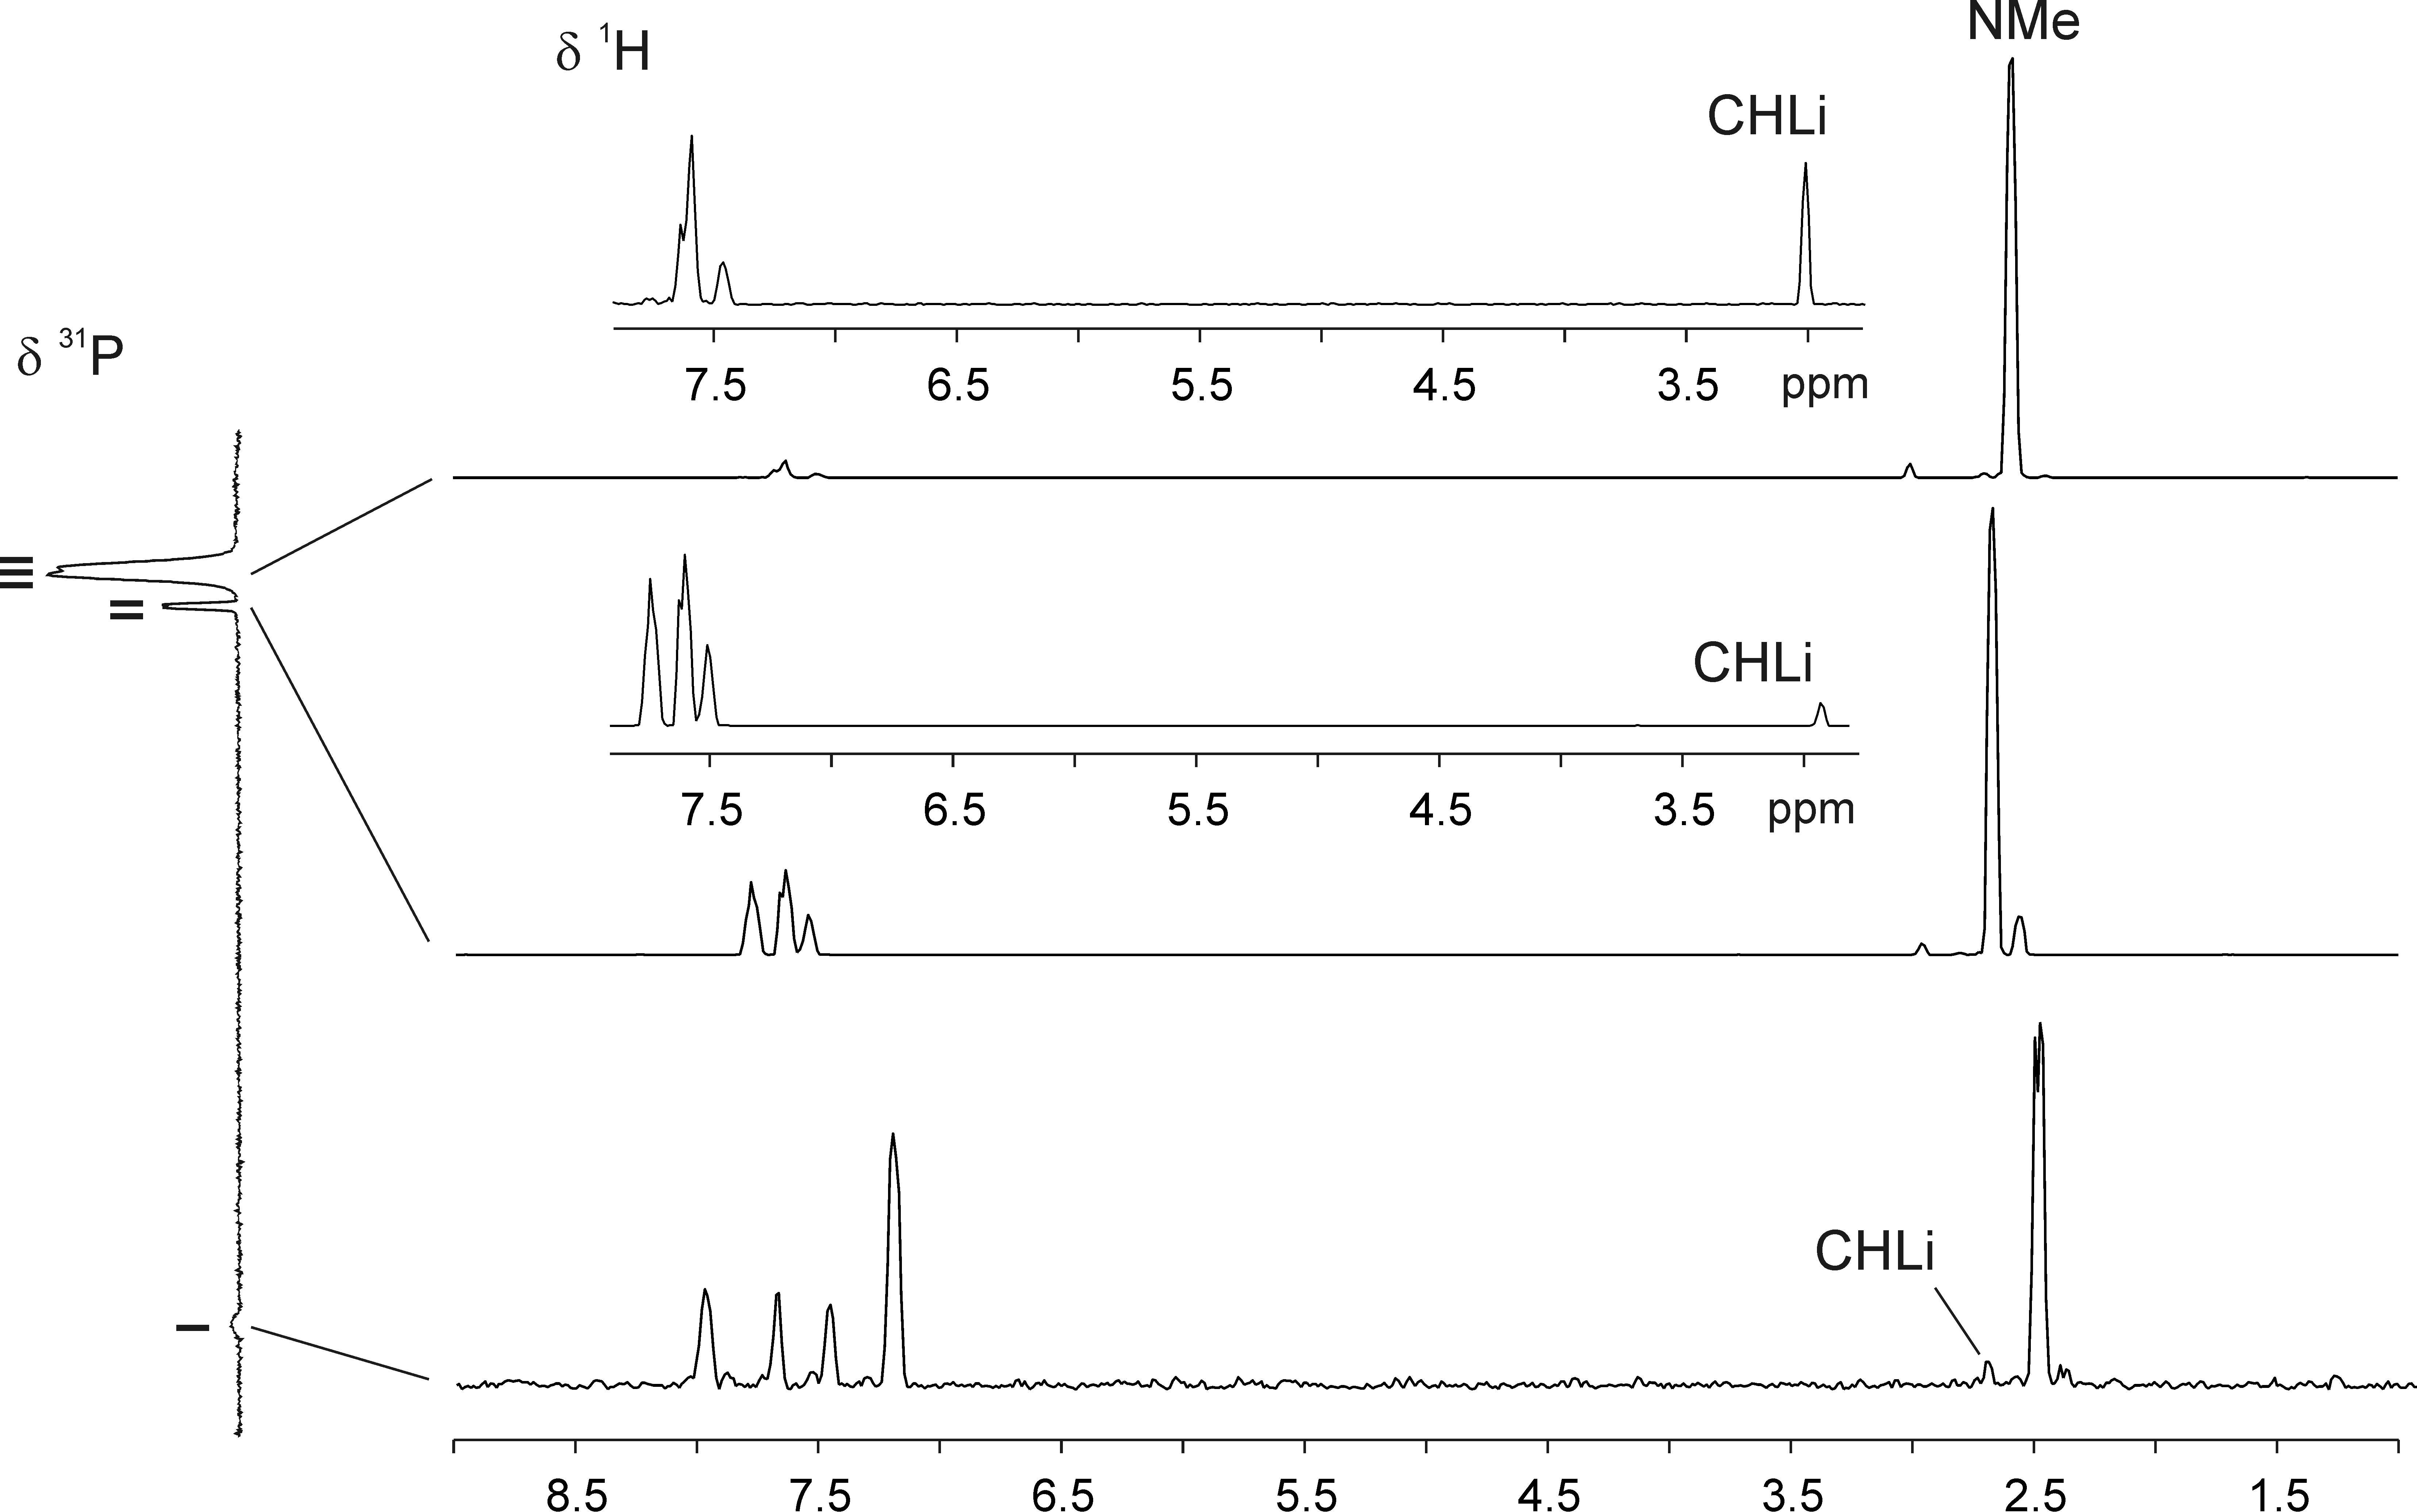


**Figure S1.** Rows extracted from 31P,1H gHMQC spectrum (202.46 MHz) of **Li+1-** at -90 ºC in Et2O-*d*10. The expansions above the rows corresponding to the chemical shifts of the 31P signals **II** and **III** highlight the correlation with the methyne proton. General parameters: spectral width, 4500 Hz for 1H and 3450 Hz for 31P; 128 increments recorded; final matrix after zero filling, 2048x512; evolution delay of n*J*PH 60 ms; 32 scans per increment in F1; sine multiplication of 2 in both dimension prior to transformation (magnitude mode). Repetition delay of 1 s. The spectrum was acquired without n*J*PH refocusing delay.

**Monomer-Dimer equilibrium**. Concentration and relative integrals obtained from 31P NMR spectra of **Li+1-** measured at different concentrations and at –105 ºC in Et2O-*d*10 are shown below. The 31P NMR spectra were acquired using the inverse-gated pulse sequence, with a pulse width of 15º and a recovery delay of 3 s. Signals **I** and **III** were assigned to dimer species D1 and D2, respectively, whereas **II** represents the monomer (M).

| Sample | Concentration | **I** (D1) | **II** (M) | **III** (D2) | Sum (M +D)a |
| --- | --- | --- | --- | --- | --- |
| 1 | 0.197 M | 0.05 | 0.12 | 1 | 1.17 |
| 2 | 0.102 M | 0.05 | 0.14 | 1 | 1.19 |
| 3 | 0.0530 M | 0.04 | 0.16 | 1 | 1.20 |
| 4 | 0.0281 M | 0.04 | 0.20 | 1 | 1.24 |

a) D= (D1 + D2)

Linear Regression for the equilibrium **I**-**III**-**II**: y = A + Bx

| Parameter | | Value | | Error | |
| --- | --- | --- | --- | --- | --- |
| A | | -2-27187 | | 0.03084 | |
| B | | 1.49266 | | 0.02498 | |
| R | SD | | N | | P |
| 0.99972 | 0.01625 | | 4 | | 2,79856E-4 |

**Figure S2**. Benzylic anions monomer-dimer linear fit.

The magnitude of *K* calculated from the linear regression equation is 0.0053.


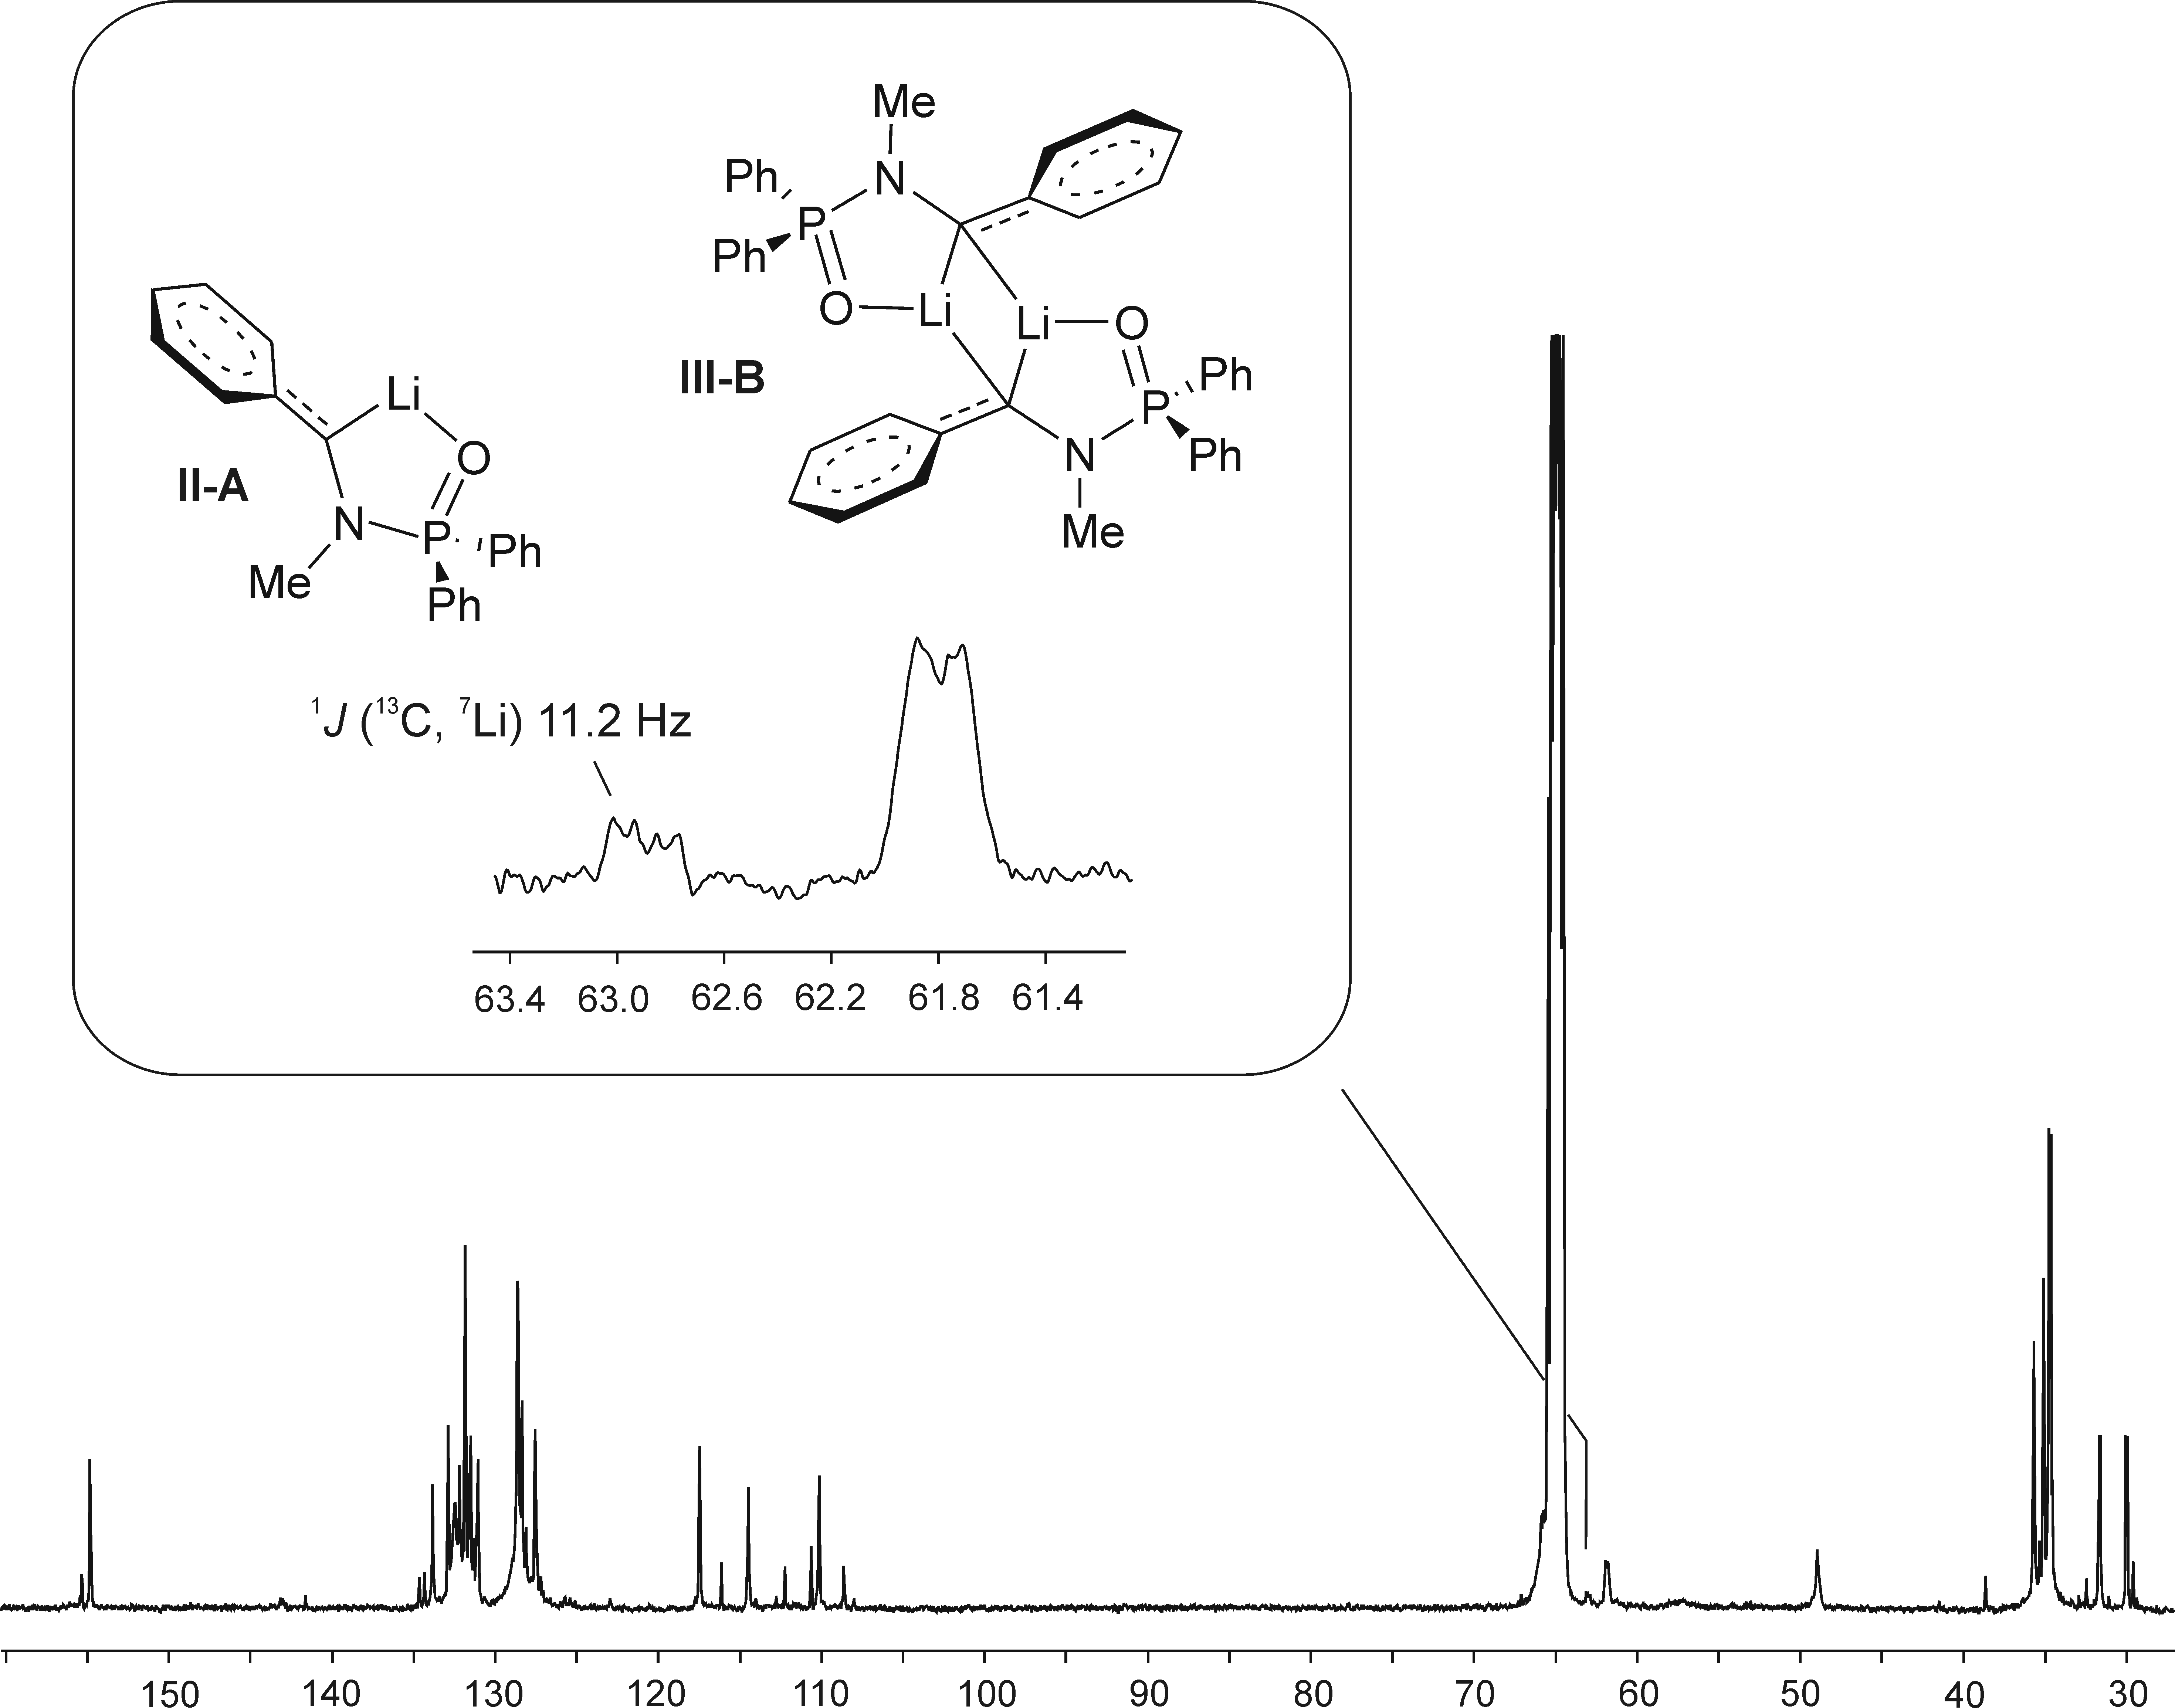


**Figure S3.** 13C {1H, 31P} NMR spectrum (125.75 MHz) of **Li+1-** measured at -105 ºC in Et2O-*d*8. General parameters: 12450 Hz of spectral width, 9216 scans accumulated, exponential multiplication of the FID (LB= 2) was performed previous to the Fourier transformation.
